# Supplementary material for: Jomon genome sheds light on East Asian population history
Source: bioRxiv or medRxiv preprint supplement (doi:10.1101/579177), 2019-03-15

Table S1

| Sample Name | Site name | Library Conc. (pM) | Total reads | Mapped reads ( <i>hg19</i> ) | Mapped %    | C>T % |
|-------------|-----------|--------------------|-------------|------------------------------|-------------|-------|
| IK001       | Ikawazu   | 12,229             | 410053      | 594                          | <b>0.14</b> | NA    |
| IK002       | Ikawazu   | 5,990              | 333597      | 8324                         | <b>2.50</b> | >10   |
| HB234       | Hobi      | 22,815             | 167190      | 19                           | <b>0.01</b> | NA    |
| HB1123      | Hobi      | 26,802             | 371468      | 247                          | <b>0.07</b> | NA    |
| HB40        | Hobi      | 22,174             | 387621      | 75                           | <b>0.02</b> | NA    |
| HB828       | Hobi      | 27,450             | 429742      | 558                          | <b>0.13</b> | NA    |
| HB952       | Hobi      | 29,380             | 236487      | 117                          | <b>0.05</b> | NA    |
| HB1284      | Hobi      | 22,069             | 288319      | 662                          | <b>0.23</b> | NA    |
| HG02        | Hegi      | 17,796             | 408947      | 6536                         | <b>1.60</b> | <0.5  |
| HG16        | Hegi      | 28,746             | 520340      | 962                          | <b>0.18</b> | NA    |
| HG29        | Hegi      | 21,433             | 355466      | 181                          | <b>0.05</b> | NA    |
| HG55        | Hegi      | 8,935              | 468529      | 2471                         | <b>0.53</b> | NA    |

Table S2

| Sample | Lib     | TotalLibReads | TrimLibReads | MappedLibReads | Duplicates | FinalLibReads | Duplicates% | Endogenous% | Efficiency% | Position      | Library construction          | Institute name of NGS data output |              |                               |                                  |
|--------|---------|---------------|--------------|----------------|------------|---------------|-------------|-------------|-------------|---------------|-------------------------------|-----------------------------------|--------------|-------------------------------|----------------------------------|
| Jomon  | Lib01   | 397,457,388   | 205,417,156  | 3,575,342      | 2,897,329  | 678,013       | 81.04       | 1.74        | 0.17        |               |                               |                                   |              |                               |                                  |
| Jomon  | Lib02   | 483,234,318   | 249,273,335  | 4,405,539      | 3,713,232  | 692,307       | 84.29       | 1.77        | 0.14        |               |                               |                                   |              |                               |                                  |
| Jomon  | Lib03   | 529,297,850   | 269,845,196  | 3,460,131      | 2,115,060  | 1,345,071     | 61.13       | 1.28        | 0.25        | Tooth dentine | NEBNext Ultra DNA library kit | NIG, Mishima, 4~25 Mar., 2016     |              |                               |                                  |
| Jomon  | Lib04   | 240,478,394   | 124,698,389  | 2,126,996      | 1,831,771  | 295,225       | 86.12       | 1.71        | 0.12        |               |                               |                                   |              |                               |                                  |
| Jomon  | Lib05   | 236,015,856   | 122,502,006  | 2,104,751      | 1,810,212  | 294,539       | 86.01       | 1.72        | 0.12        |               |                               |                                   |              |                               |                                  |
| Jomon  | Lib6    | 433,647,102   | 221,339,926  | 2,817,039      | 1,580,164  | 1,236,875     | 56.09       | 1.27        | 0.29        |               |                               |                                   |              |                               |                                  |
| Jomon  | 104     | 237,971,558   | 122,881,163  | 7,385,634      | 5,524,508  | 1,861,126     | 74.80       | 6.01        | 0.78        |               |                               |                                   |              |                               |                                  |
| Jomon  | 105     | 227,075,442   | 117,476,528  | 7,330,363      | 5,426,615  | 1,903,748     | 74.03       | 6.24        | 0.84        |               |                               |                                   |              |                               |                                  |
| Jomon  | 106     | 231,544,700   | 121,574,515  | 6,851,193      | 4,664,805  | 2,186,388     | 68.09       | 5.64        | 0.94        |               |                               |                                   |              |                               |                                  |
| Jomon  | 107     | 215,787,182   | 113,748,656  | 6,303,999      | 4,553,925  | 1,750,074     | 72.24       | 5.54        | 0.81        |               |                               |                                   |              |                               |                                  |
| Jomon  | 109     | 237,651,346   | 115,421,561  | 3,336,984      | 212,551    | 3,124,433     | 6.37        | 2.89        | 1.31        |               |                               |                                   |              |                               |                                  |
| Jomon  | 110     | 237,907,508   | 119,164,747  | 19,111,803     | 2,447,870  | 16,663,933    | 12.81       | 16.04       | 7.00        |               |                               |                                   |              |                               |                                  |
| Jomon  | 113     | 234,657,460   | 120,814,912  | 7,476,311      | 5,404,946  | 2,071,365     | 72.29       | 6.19        | 0.88        |               |                               |                                   |              |                               |                                  |
| Jomon  | 114     | 235,799,456   | 117,649,335  | 8,331,258      | 6,443,033  | 1,888,225     | 77.34       | 7.08        | 0.80        | Petrous bone  | NEBNext Ultra DNA library kit | NIG, Mishima, 20 Feb., 2017       |              |                               |                                  |
| Jomon  | 115     | 235,981,678   | 116,175,678  | 8,661,251      | 6,764,525  | 1,896,726     | 78.10       | 7.46        | 0.80        |               |                               |                                   |              |                               |                                  |
| Jomon  | 116     | 233,981,444   | 117,490,393  | 2,162,154      | 1,918,880  | 243,274       | 88.75       | 1.84        | 0.10        |               |                               |                                   |              |                               |                                  |
| Jomon  | 118     | 235,630,834   | 121,236,313  | 1,973,621      | 1,741,222  | 232,399       | 88.22       | 1.63        | 0.10        |               |                               |                                   |              |                               |                                  |
| Jomon  | 119     | 232,848,604   | 119,348,059  | 1,981,256      | 1,744,192  | 237,064       | 88.03       | 1.66        | 0.10        |               |                               |                                   |              |                               |                                  |
| Jomon  | 120     | 230,906,338   | 118,884,804  | 1,942,120      | 1,681,914  | 260,206       | 86.60       | 1.63        | 0.11        |               |                               |                                   |              |                               |                                  |
| Jomon  | 121     | 234,290,444   | 119,349,954  | 2,017,349      | 1,757,562  | 259,787       | 87.12       | 1.69        | 0.11        |               |                               |                                   |              |                               |                                  |
| Jomon  | 122     | 230,406,198   | 119,300,898  | 1,962,062      | 1,694,754  | 267,308       | 86.38       | 1.64        | 0.12        |               |                               |                                   |              |                               |                                  |
| Jomon  | 123     | 232,333,464   | 118,067,281  | 2,026,813      | 1,785,558  | 241,255       | 88.10       | 1.72        | 0.10        |               |                               |                                   |              |                               |                                  |
| Jomon  | 125     | 241,895,316   | 125,060,174  | 23,871,213     | 7,864,240  | 16,006,973    | 32.94       | 19.09       | 6.62        |               |                               |                                   |              |                               |                                  |
| Jomon  | 127     | 241,450,064   | 126,487,721  | 22,510,933     | 6,543,998  | 15,966,935    | 29.07       | 17.80       | 6.61        |               |                               |                                   |              |                               |                                  |
| Jomon  | 19      | 10,988,506    | 5,355,997    | 163,147        | 607        | 162,540       | 0.37        | 3.05        | 1.48        |               |                               |                                   | Petrous bone | NEBNext Ultra DNA library kit | Kyushu University, 24 Aug., 2016 |
| Jomon  | 110     | 11,869,178    | 6,063,566    | 992,308        | 8,761      | 983,547       | 0.88        | 16.37       | 8.29        |               |                               |                                   |              |                               |                                  |
| Jomon  | Jomon_1 | 52,887,549    | 50,856,175   | 582,006        | 6,196      | 575,810       | 1.06        | 1.14        | 1.09        |               |                               |                                   |              |                               |                                  |
| Jomon  | Jomon_2 | 36,617,606    | 34,413,362   | 1,173,038      | 15,946     | 1,157,092     | 1.36        | 3.41        | 3.16        |               |                               |                                   |              |                               |                                  |
| Jomon  | Jomon_3 | 48,563,648    | 47,834,030   | 5,590,451      | 113,727    | 5,476,724     | 2.03        | 11.69       | 11.28       | Petrous bone  | Allentoft et al. 2015         | CGG, Copenhagen, Oct., 2016       |              |                               |                                  |
| Jomon  | Jomon_4 | 58,511,078    | 56,245,786   | 4,845,321      | 88,276     | 4,757,045     | 1.82        | 8.61        | 8.13        |               |                               |                                   |              |                               |                                  |
| Jomon  | Jomon_5 | 43,866,323    | 42,562,678   | 2,946,263      | 386,321    | 2,559,942     | 13.11       | 6.92        | 5.84        |               |                               |                                   |              |                               |                                  |

Table S3

| Target   | Ref 1 | Ref 2    | Amplitude |         |     | Decay    |      |     |
|----------|-------|----------|-----------|---------|-----|----------|------|-----|
|          |       |          | Estimate  | SE      | Z   | Estimate | SE   | Z   |
| Japanese | IK002 | Han      | 0.00037   | 0.00006 | 6.3 | 49.8     | 7.6  | 6.6 |
| Ulchi    | IK002 | Han      | 0.00014   | 0.00005 | 2.7 | 20.8     | 12.6 | 1.7 |
| Ainu     | IK002 | Japanese | 0.00018   | 0.00003 | 5.8 | 3.3      | 1.1  | 3.0 |

Table S4

| W     | X   | Y             | Z   | D_score | D_sd   | D_2sd  | Z_score | SNPs    |
|-------|-----|---------------|-----|---------|--------|--------|---------|---------|
| Mbuti | MA1 | Atayal        | Ami | 0.0033  | 0.0050 | 0.0100 | 0.662   | 1285783 |
| Mbuti | MA1 | Burmese       | Ami | -0.0012 | 0.0040 | 0.0081 | -0.287  | 1352503 |
| Mbuti | MA1 | Cambodian     | Ami | 0.0021  | 0.0040 | 0.0081 | 0.528   | 1355903 |
| Mbuti | MA1 | Dai           | Ami | -0.0008 | 0.0037 | 0.0074 | -0.209  | 1360951 |
| Mbuti | MA1 | Daur          | Ami | -0.0070 | 0.0048 | 0.0095 | -1.467  | 1290590 |
| Mbuti | MA1 | Dusun         | Ami | 0.0081  | 0.0041 | 0.0083 | 1.962   | 1354965 |
| Mbuti | MA1 | Han           | Ami | -0.0010 | 0.0039 | 0.0078 | -0.252  | 1355943 |
| Mbuti | MA1 | Hezhen        | Ami | -0.0009 | 0.0041 | 0.0083 | -0.210  | 1356366 |
| Mbuti | MA1 | Igorot        | Ami | 0.0033  | 0.0038 | 0.0077 | 0.862   | 1354278 |
| Mbuti | MA1 | Japanese      | Ami | 0.0008  | 0.0037 | 0.0073 | 0.225   | 1360859 |
| Mbuti | MA1 | Kinh          | Ami | -0.0001 | 0.0040 | 0.0080 | -0.013  | 1355428 |
| Mbuti | MA1 | Korean        | Ami | -0.0009 | 0.0041 | 0.0082 | -0.211  | 1353161 |
| Mbuti | MA1 | Lahu          | Ami | -0.0007 | 0.0041 | 0.0082 | -0.174  | 1356419 |
| Mbuti | MA1 | Miao          | Ami | 0.0024  | 0.0040 | 0.0080 | 0.590   | 1352492 |
| Mbuti | MA1 | Mongola       | Ami | -0.0042 | 0.0040 | 0.0079 | -1.059  | 1353167 |
| Mbuti | MA1 | Naxi          | Ami | -0.0013 | 0.0038 | 0.0075 | -0.346  | 1360569 |
| Mbuti | MA1 | Oroqen        | Ami | -0.0136 | 0.0041 | 0.0082 | -3.311  | 1355451 |
| Mbuti | MA1 | She           | Ami | -0.0009 | 0.0041 | 0.0083 | -0.211  | 1349530 |
| Mbuti | MA1 | Thai          | Ami | 0.0017  | 0.0039 | 0.0078 | 0.439   | 1353479 |
| Mbuti | MA1 | Tu            | Ami | -0.0039 | 0.0041 | 0.0083 | -0.952  | 1354164 |
| Mbuti | MA1 | Tujia         | Ami | 0.0001  | 0.0040 | 0.0080 | 0.034   | 1350557 |
| Mbuti | MA1 | Xibo          | Ami | -0.0003 | 0.0039 | 0.0079 | -0.065  | 1351587 |
| Mbuti | MA1 | Yi            | Ami | 0.0001  | 0.0039 | 0.0079 | 0.029   | 1344798 |
| Mbuti | MA1 | Buryat        | Ami | -0.0197 | 0.0043 | 0.0086 | -4.564  | 1339868 |
| Mbuti | MA1 | Chaplin       | Ami | -0.0466 | 0.0052 | 0.0104 | -8.922  | 1302308 |
| Mbuti | MA1 | Naukan        | Ami | -0.0500 | 0.0044 | 0.0088 | -11.332 | 1351888 |
| Mbuti | MA1 | Sireniki      | Ami | -0.0484 | 0.0044 | 0.0088 | -10.961 | 1362400 |
| Mbuti | MA1 | Yupik         | Ami | -0.0552 | 0.0048 | 0.0097 | -11.404 | 1020542 |
| Mbuti | MA1 | Even          | Ami | -0.0194 | 0.0036 | 0.0073 | -5.323  | 1360314 |
| Mbuti | MA1 | Evenk         | Ami | -0.0260 | 0.0048 | 0.0096 | -5.428  | 1305016 |
| Mbuti | MA1 | Itelman       | Ami | -0.0498 | 0.0050 | 0.0099 | -10.047 | 1283108 |
| Mbuti | MA1 | Ket           | Ami | -0.0550 | 0.0045 | 0.0091 | -12.116 | 1304859 |
| Mbuti | MA1 | Khanty        | Ami | -0.0545 | 0.0040 | 0.0080 | -13.656 | 1361167 |
| Mbuti | MA1 | KomiIzhma     | Ami | -0.0474 | 0.0046 | 0.0093 | -10.241 | 1358004 |
| Mbuti | MA1 | KomiObyachevo | Ami | -0.0520 | 0.0047 | 0.0094 | -11.120 | 1353998 |
| Mbuti | MA1 | Koryak        | Ami | -0.0453 | 0.0045 | 0.0090 | -10.010 | 1339133 |
| Mbuti | MA1 | Ulchi         | Ami | -0.0132 | 0.0042 | 0.0084 | -3.144  | 1354218 |
| Mbuti | MA1 | Nivkh         | Ami | -0.0163 | 0.0043 | 0.0087 | -3.754  | 1343844 |
| Mbuti | MA1 | Chukchi       | Ami | -0.0437 | 0.0049 | 0.0098 | -8.948  | 1300660 |
| Mbuti | MA1 | Chokhopani    | Ami | -0.0037 | 0.0051 | 0.0102 | -0.724  | 1353283 |
| Mbuti | MA1 | Devilscave    | Ami | 0.0091  | 0.0041 | 0.0082 | 2.213   | 1362226 |
| Mbuti | MA1 | IK002         | Ami | -0.0009 | 0.0054 | 0.0109 | -0.157  | 1124703 |



Table S5

| W     | X               | Y   | Z   | D_score | D_sd   | D_2sd  | Z_score | SNPs    |
|-------|-----------------|-----|-----|---------|--------|--------|---------|---------|
| Mbuti | Atayal          | MA1 | Ami | 0.1851  | 0.0053 | 0.0106 | 35.069  | 1285783 |
| Mbuti | Burmese         | MA1 | Ami | 0.1230  | 0.0045 | 0.0090 | 27.428  | 1352503 |
| Mbuti | Cambodian       | MA1 | Ami | 0.1304  | 0.0044 | 0.0088 | 29.484  | 1355903 |
| Mbuti | Dai             | MA1 | Ami | 0.1527  | 0.0043 | 0.0086 | 35.418  | 1360951 |
| Mbuti | Daur            | MA1 | Ami | 0.1247  | 0.0054 | 0.0107 | 23.267  | 1290590 |
| Mbuti | Dusun           | MA1 | Ami | 0.1732  | 0.0046 | 0.0091 | 37.992  | 1354965 |
| Mbuti | Han             | MA1 | Ami | 0.1528  | 0.0047 | 0.0094 | 32.468  | 1355943 |
| Mbuti | Hezhen          | MA1 | Ami | 0.1286  | 0.0045 | 0.0090 | 28.494  | 1356366 |
| Mbuti | Igorot          | MA1 | Ami | 0.1859  | 0.0047 | 0.0094 | 39.746  | 1354278 |
| Mbuti | Japanese        | MA1 | Ami | 0.1428  | 0.0043 | 0.0086 | 33.163  | 1360859 |
| Mbuti | Kinh            | MA1 | Ami | 0.1530  | 0.0045 | 0.0090 | 33.950  | 1355428 |
| Mbuti | Korean          | MA1 | Ami | 0.1436  | 0.0046 | 0.0091 | 31.505  | 1353161 |
| Mbuti | Lahu            | MA1 | Ami | 0.1440  | 0.0045 | 0.0090 | 31.830  | 1356419 |
| Mbuti | Miao            | MA1 | Ami | 0.1533  | 0.0045 | 0.0090 | 34.003  | 1352492 |
| Mbuti | Mongola         | MA1 | Ami | 0.1289  | 0.0047 | 0.0093 | 27.675  | 1353167 |
| Mbuti | Naxi            | MA1 | Ami | 0.1361  | 0.0045 | 0.0089 | 30.539  | 1360569 |
| Mbuti | Oroqen          | MA1 | Ami | 0.1147  | 0.0047 | 0.0095 | 24.187  | 1355451 |
| Mbuti | She             | MA1 | Ami | 0.1576  | 0.0047 | 0.0093 | 33.826  | 1349530 |
| Mbuti | Thai            | MA1 | Ami | 0.1391  | 0.0045 | 0.0090 | 31.067  | 1353479 |
| Mbuti | Tu              | MA1 | Ami | 0.1229  | 0.0046 | 0.0091 | 26.929  | 1354164 |
| Mbuti | Tujia           | MA1 | Ami | 0.1537  | 0.0046 | 0.0092 | 33.380  | 1350557 |
| Mbuti | Xibo            | MA1 | Ami | 0.1303  | 0.0044 | 0.0087 | 29.833  | 1351587 |
| Mbuti | Yi              | MA1 | Ami | 0.1401  | 0.0044 | 0.0089 | 31.499  | 1344798 |
| Mbuti | Buryat          | MA1 | Ami | 0.0969  | 0.0047 | 0.0094 | 20.631  | 1339868 |
| Mbuti | Eskimo_Chaplin  | MA1 | Ami | 0.0635  | 0.0056 | 0.0113 | 11.291  | 1302308 |
| Mbuti | Eskimo_Naukan   | MA1 | Ami | 0.0532  | 0.0048 | 0.0095 | 11.176  | 1351888 |
| Mbuti | Eskimo_Sireniki | MA1 | Ami | 0.0569  | 0.0045 | 0.0090 | 12.602  | 1362400 |
| Mbuti | Eskimo_Yupik    | MA1 | Ami | 0.0568  | 0.0052 | 0.0104 | 10.890  | 1020542 |
| Mbuti | Even            | MA1 | Ami | 0.0926  | 0.0044 | 0.0088 | 20.995  | 1360314 |
| Mbuti | Evenk           | MA1 | Ami | 0.1046  | 0.0054 | 0.0109 | 19.224  | 1305016 |
| Mbuti | Itelman         | MA1 | Ami | 0.0652  | 0.0057 | 0.0114 | 11.467  | 1283108 |
| Mbuti | Ket             | MA1 | Ami | 0.0259  | 0.0048 | 0.0097 | 5.358   | 1304859 |
| Mbuti | Khanty          | MA1 | Ami | 0.0108  | 0.0043 | 0.0086 | 2.511   | 1361167 |
| Mbuti | KomiIzhma       | MA1 | Ami | -0.0334 | 0.0046 | 0.0091 | -7.311  | 1358004 |
| Mbuti | KomiObyachevo   | MA1 | Ami | -0.0336 | 0.0047 | 0.0094 | -7.128  | 1353998 |
| Mbuti | Koryak          | MA1 | Ami | 0.0780  | 0.0051 | 0.0101 | 15.395  | 1339133 |
| Mbuti | Ulchi           | MA1 | Ami | 0.1169  | 0.0045 | 0.0090 | 25.907  | 1354218 |
| Mbuti | Nivkh           | MA1 | Ami | 0.1230  | 0.0050 | 0.0100 | 24.560  | 1343844 |
| Mbuti | Chukchi         | MA1 | Ami | 0.0099  | 0.0053 | 0.0106 | 1.861   | 1300660 |
| Mbuti | Chokhopani      | MA1 | Ami | 0.1137  | 0.0054 | 0.0108 | 21.098  | 1353283 |
| Mbuti | Devilscave      | MA1 | Ami | 0.1369  | 0.0046 | 0.0092 | 29.867  | 1362226 |
| Mbuti | IK002           | MA1 | Ami | 0.1021  | 0.0059 | 0.0117 | 17.388  | 1124703 |

Table S6

| W     | X   | Y             | Z   | D_score | D_sd   | D_2sig | Z_score | SNPs    |
|-------|-----|---------------|-----|---------|--------|--------|---------|---------|
| Mbuti | Ami | Atayal        | MA1 | -0.1819 | 0.0052 | 0.0104 | -34.962 | 1285783 |
| Mbuti | Ami | Burmese       | MA1 | -0.1241 | 0.0045 | 0.0089 | -27.738 | 1352503 |
| Mbuti | Ami | Cambodian     | MA1 | -0.1283 | 0.0048 | 0.0095 | -26.966 | 1355903 |
| Mbuti | Ami | Dai           | MA1 | -0.1534 | 0.0044 | 0.0088 | -34.851 | 1360951 |
| Mbuti | Ami | Daur          | MA1 | -0.1316 | 0.0052 | 0.0104 | -25.420 | 1290590 |
| Mbuti | Ami | Dusun         | MA1 | -0.1654 | 0.0045 | 0.0091 | -36.444 | 1354965 |
| Mbuti | Ami | Han           | MA1 | -0.1537 | 0.0046 | 0.0093 | -33.161 | 1355943 |
| Mbuti | Ami | Hezhen        | MA1 | -0.1295 | 0.0048 | 0.0095 | -27.205 | 1356366 |
| Mbuti | Ami | Igorot        | MA1 | -0.1827 | 0.0045 | 0.0089 | -40.967 | 1354278 |
| Mbuti | Ami | Japanese      | MA1 | -0.1420 | 0.0045 | 0.0090 | -31.558 | 1360859 |
| Mbuti | Ami | Kinh          | MA1 | -0.1531 | 0.0046 | 0.0092 | -33.256 | 1355428 |
| Mbuti | Ami | Korean        | MA1 | -0.1445 | 0.0047 | 0.0093 | -30.972 | 1353161 |
| Mbuti | Ami | Lahu          | MA1 | -0.1447 | 0.0045 | 0.0090 | -32.191 | 1356419 |
| Mbuti | Ami | Miao          | MA1 | -0.1510 | 0.0045 | 0.0090 | -33.408 | 1352492 |
| Mbuti | Ami | Mongola       | MA1 | -0.1330 | 0.0046 | 0.0092 | -29.041 | 1353167 |
| Mbuti | Ami | Naxi          | MA1 | -0.1373 | 0.0046 | 0.0091 | -30.171 | 1360569 |
| Mbuti | Ami | Oroqen        | MA1 | -0.1282 | 0.0047 | 0.0093 | -27.479 | 1355451 |
| Mbuti | Ami | She           | MA1 | -0.1585 | 0.0046 | 0.0093 | -34.224 | 1349530 |
| Mbuti | Ami | Thai          | MA1 | -0.1374 | 0.0044 | 0.0088 | -31.082 | 1353479 |
| Mbuti | Ami | Tu            | MA1 | -0.1268 | 0.0048 | 0.0095 | -26.567 | 1354164 |
| Mbuti | Ami | Tujia         | MA1 | -0.1535 | 0.0046 | 0.0092 | -33.208 | 1350557 |
| Mbuti | Ami | Xibo          | MA1 | -0.1306 | 0.0046 | 0.0092 | -28.527 | 1351587 |
| Mbuti | Ami | Yi            | MA1 | -0.1400 | 0.0046 | 0.0091 | -30.753 | 1344798 |
| Mbuti | Ami | Buryat        | MA1 | -0.1164 | 0.0048 | 0.0096 | -24.375 | 1339868 |
| Mbuti | Ami | Chaplin       | MA1 | -0.1098 | 0.0053 | 0.0106 | -20.766 | 1302308 |
| Mbuti | Ami | Naukan        | MA1 | -0.1029 | 0.0048 | 0.0096 | -21.541 | 1351888 |
| Mbuti | Ami | Sireniki      | MA1 | -0.1051 | 0.0047 | 0.0094 | -22.393 | 1362400 |
| Mbuti | Ami | Yupik         | MA1 | -0.1117 | 0.0051 | 0.0103 | -21.723 | 1020542 |
| Mbuti | Ami | Even          | MA1 | -0.1118 | 0.0045 | 0.0090 | -24.888 | 1360314 |
| Mbuti | Ami | Evenk         | MA1 | -0.1302 | 0.0054 | 0.0108 | -24.097 | 1305016 |
| Mbuti | Ami | Itelman       | MA1 | -0.1146 | 0.0052 | 0.0104 | -22.125 | 1283108 |
| Mbuti | Ami | Ket           | MA1 | -0.0808 | 0.0048 | 0.0096 | -16.885 | 1304859 |
| Mbuti | Ami | Khanty        | MA1 | -0.0652 | 0.0043 | 0.0086 | -15.090 | 1361167 |
| Mbuti | Ami | KomiIzhma     | MA1 | -0.0140 | 0.0047 | 0.0093 | -3.002  | 1358004 |
| Mbuti | Ami | KomiObyachevo | MA1 | -0.0185 | 0.0046 | 0.0092 | -3.995  | 1353998 |
| Mbuti | Ami | Koryak        | MA1 | -0.1228 | 0.0048 | 0.0097 | -25.435 | 1339133 |
| Mbuti | Ami | Ulchi         | MA1 | -0.1299 | 0.0047 | 0.0093 | -27.806 | 1354218 |
| Mbuti | Ami | Nivkh         | MA1 | -0.1390 | 0.0048 | 0.0095 | -29.134 | 1343844 |
| Mbuti | Ami | Chukuchi      | MA1 | -0.0536 | 0.0051 | 0.0102 | -10.561 | 1300660 |
| Mbuti | Ami | Chokhopani    | MA1 | -0.1174 | 0.0051 | 0.0103 | -22.821 | 1353283 |
| Mbuti | Ami | Devilscape    | MA1 | -0.1279 | 0.0047 | 0.0094 | -27.119 | 1362226 |
| Mbuti | Ami | IK002         | MA1 | -0.1030 | 0.0053 | 0.0106 | -19.350 | 1124703 |

Fig. S1

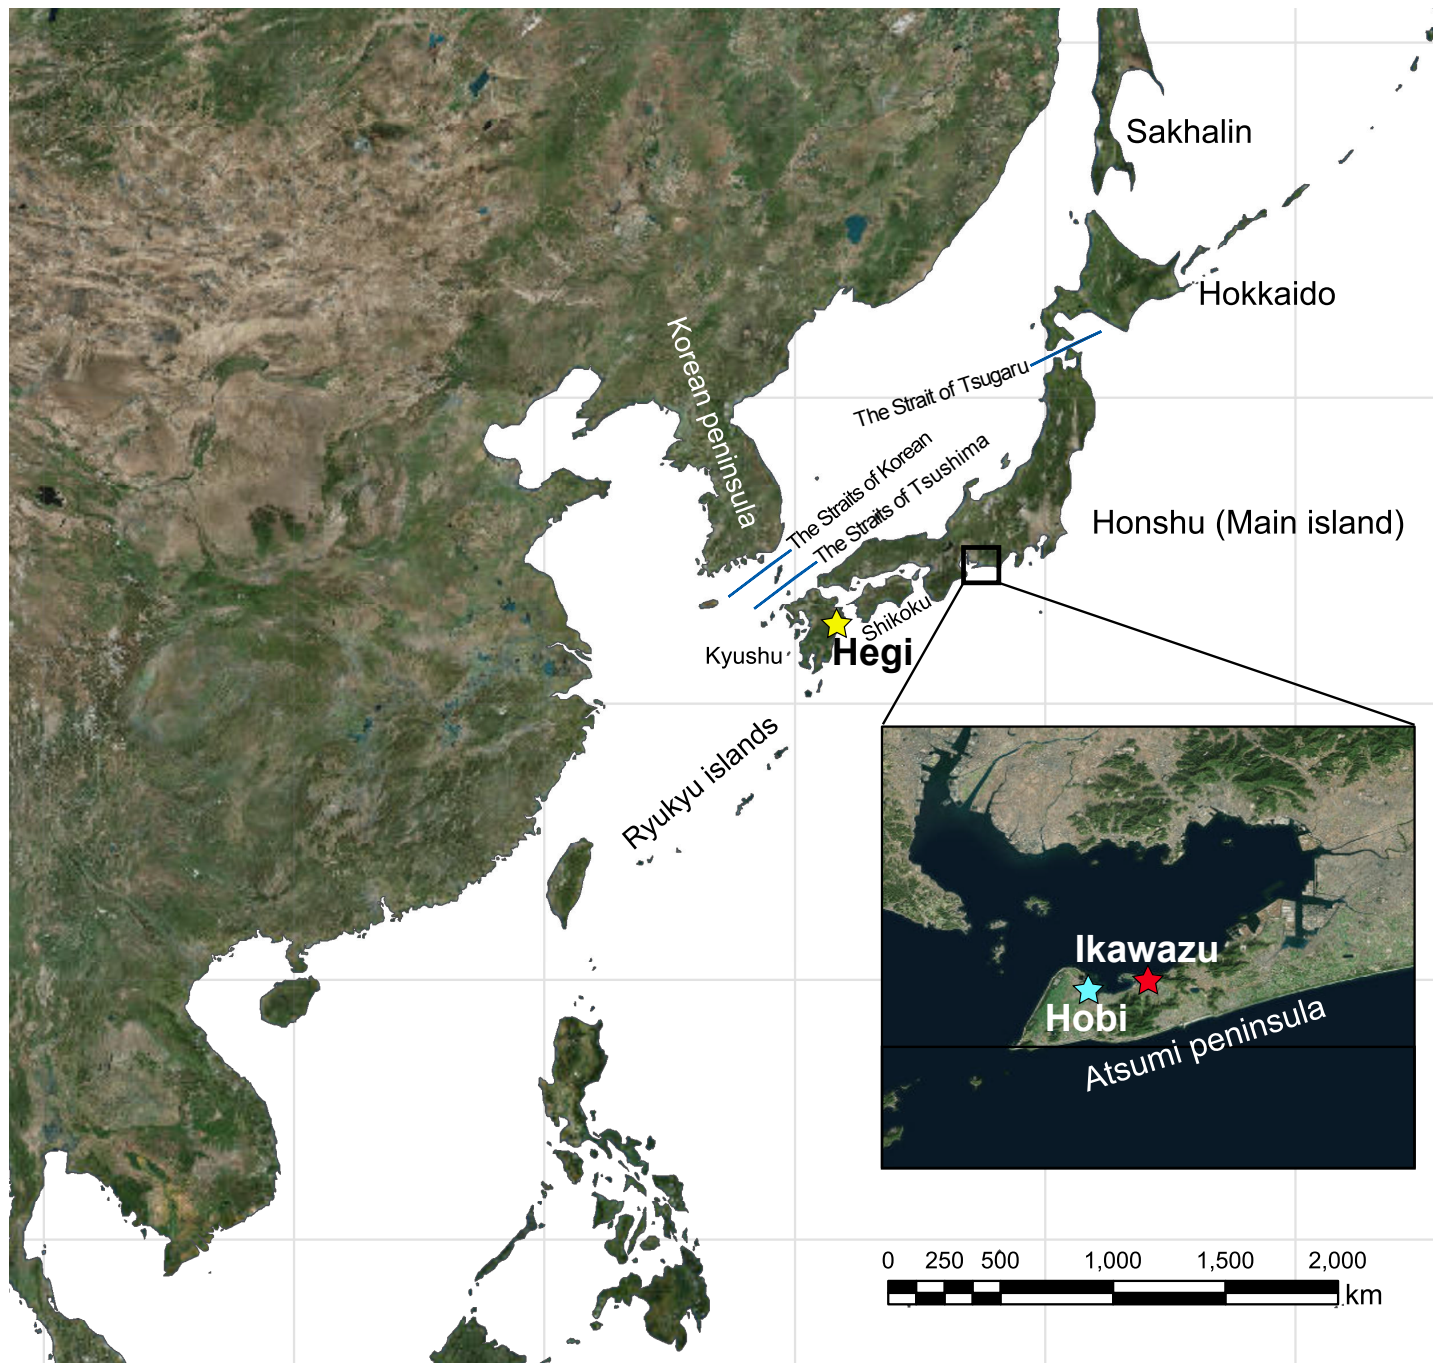

Fig. S2

Modern  
Japanese

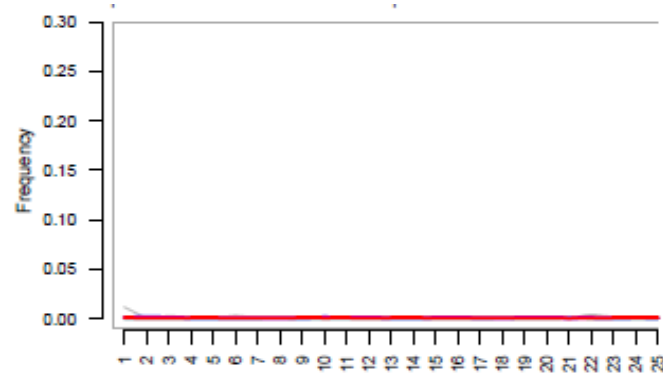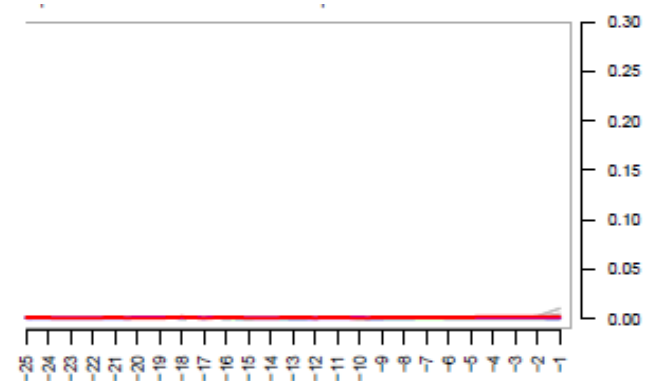

IK002

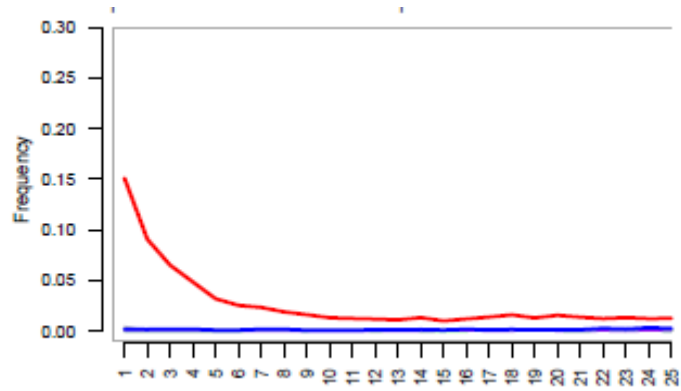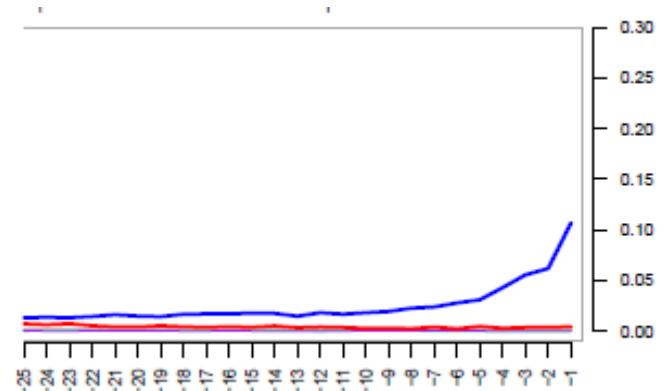

HG02

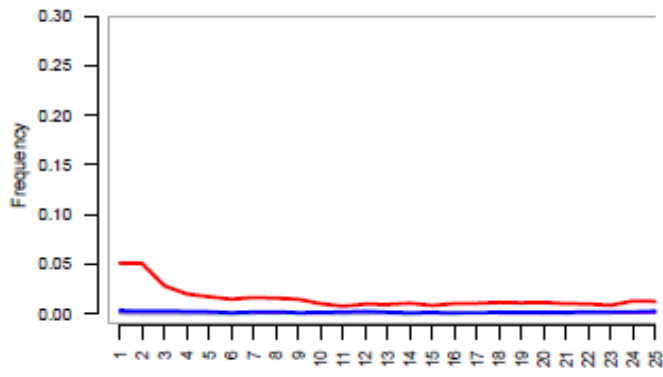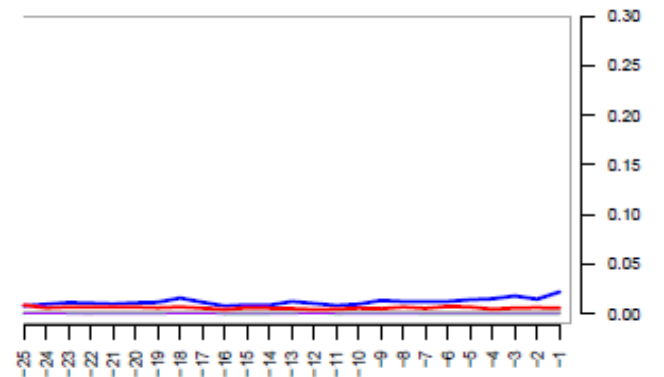

Fig. S3

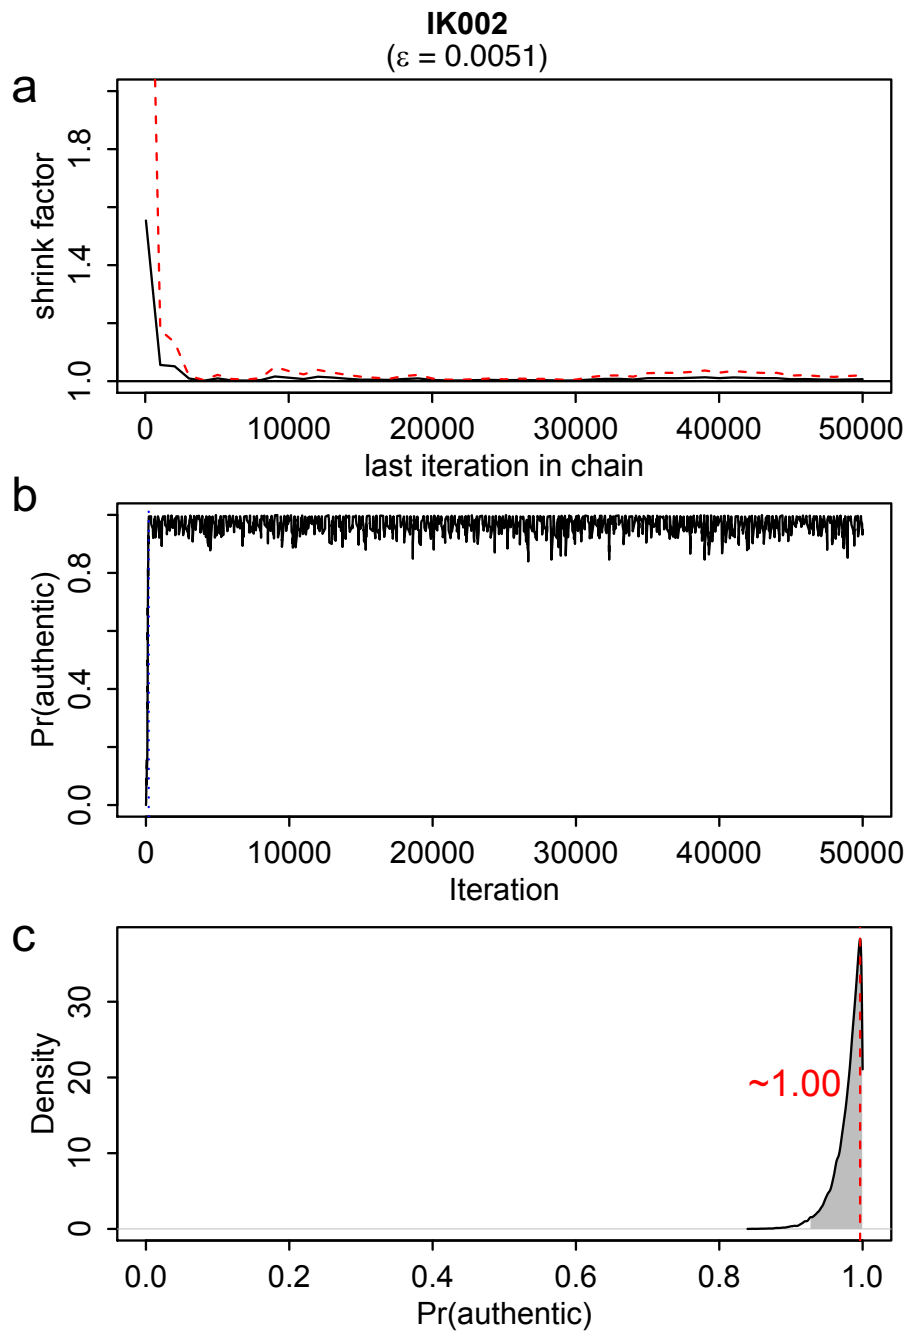

Fig. S4

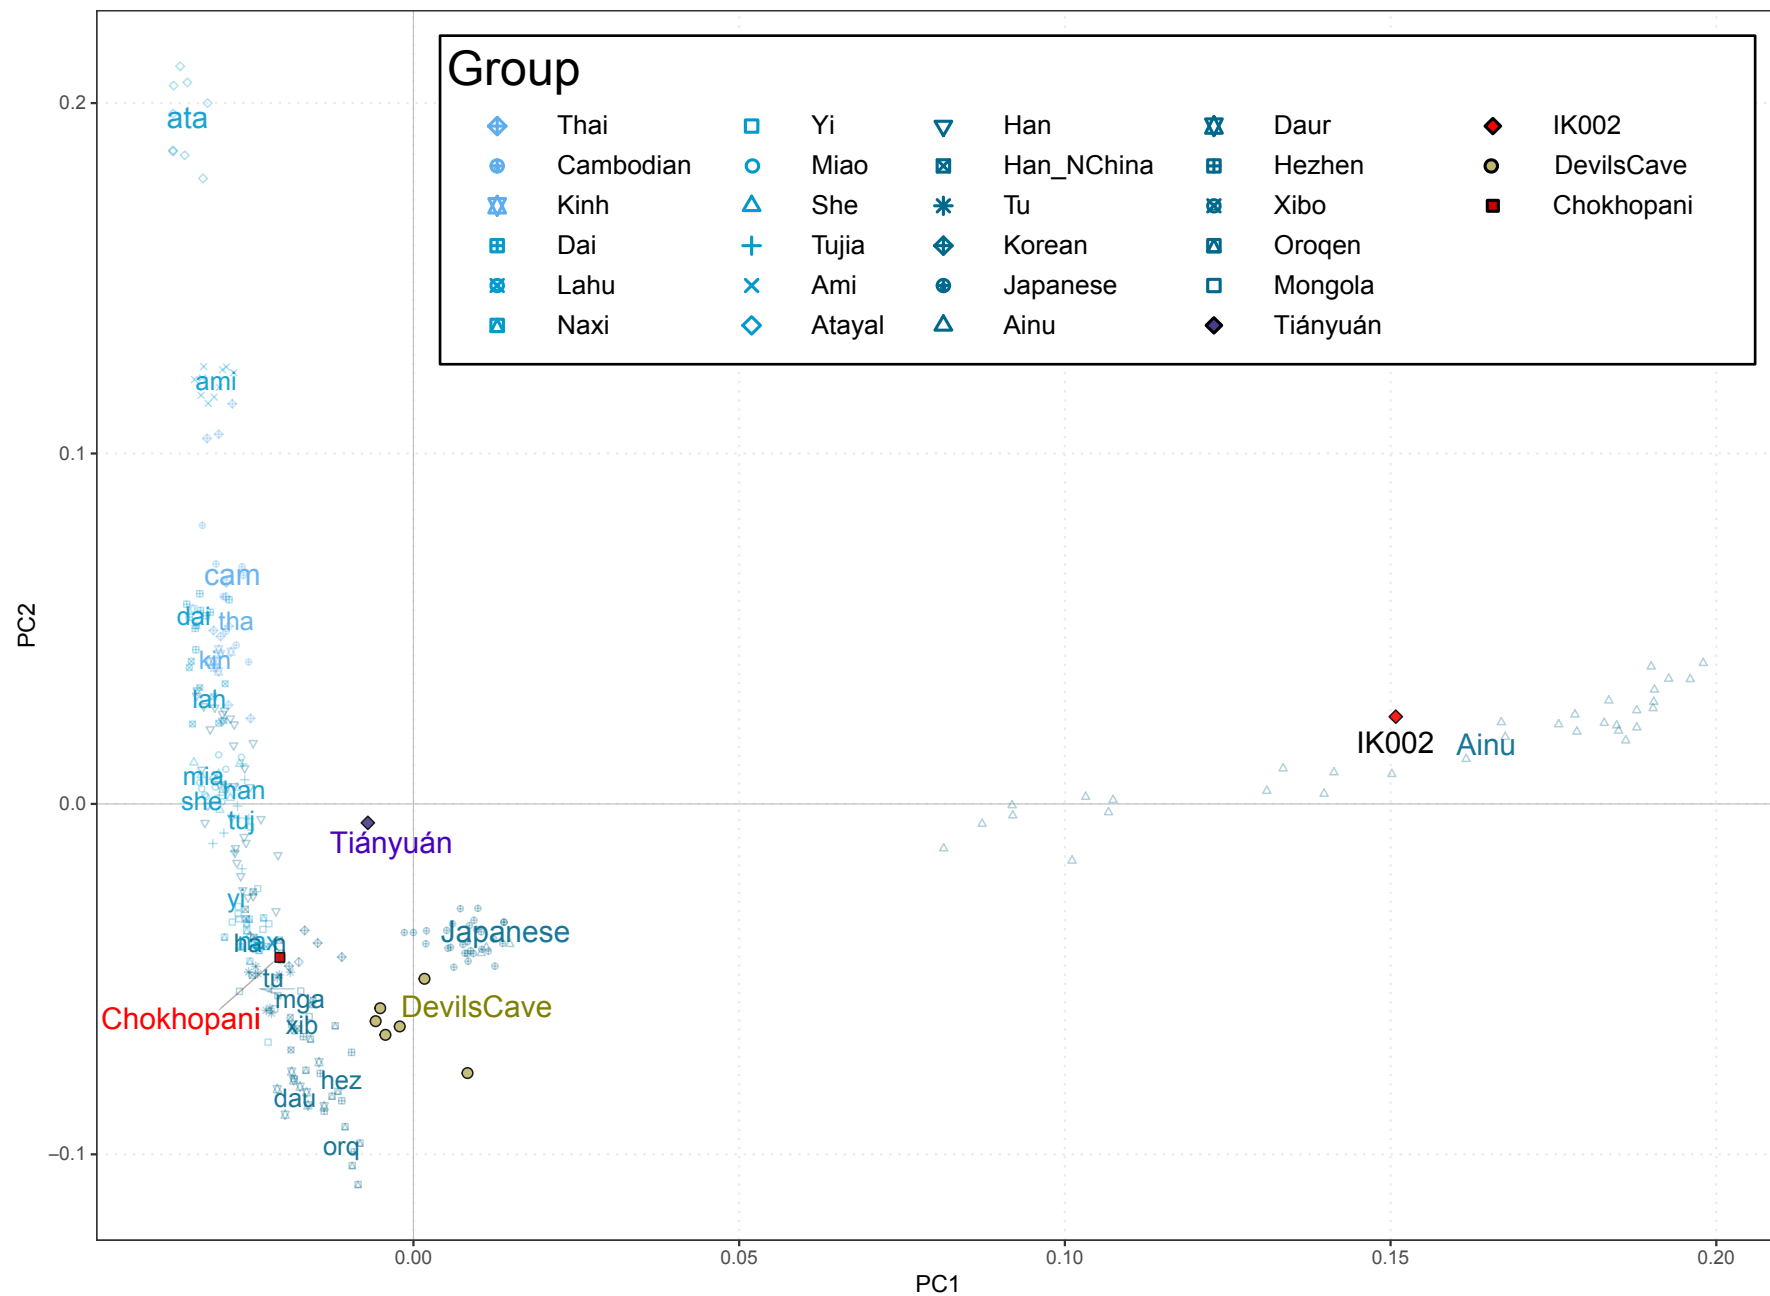

Fig. S5

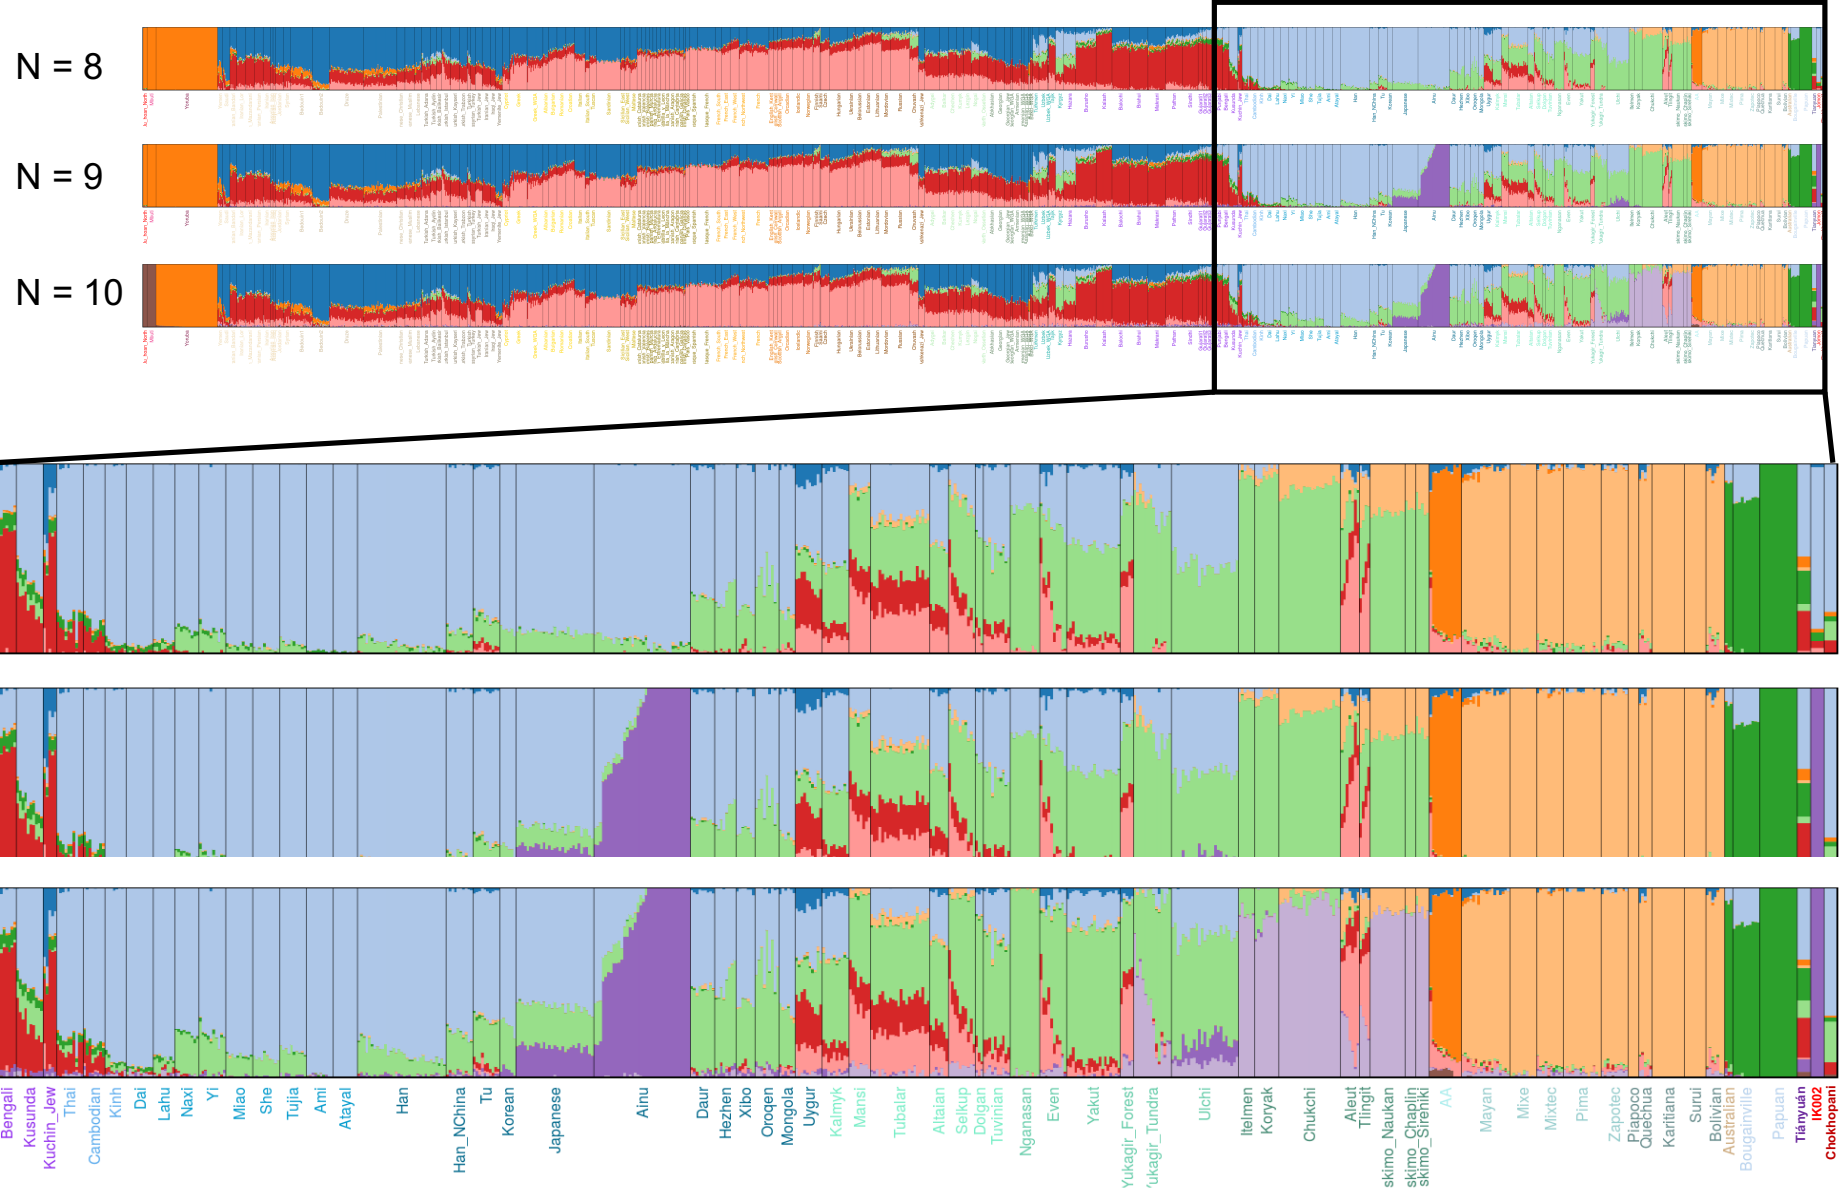

Fig. S6

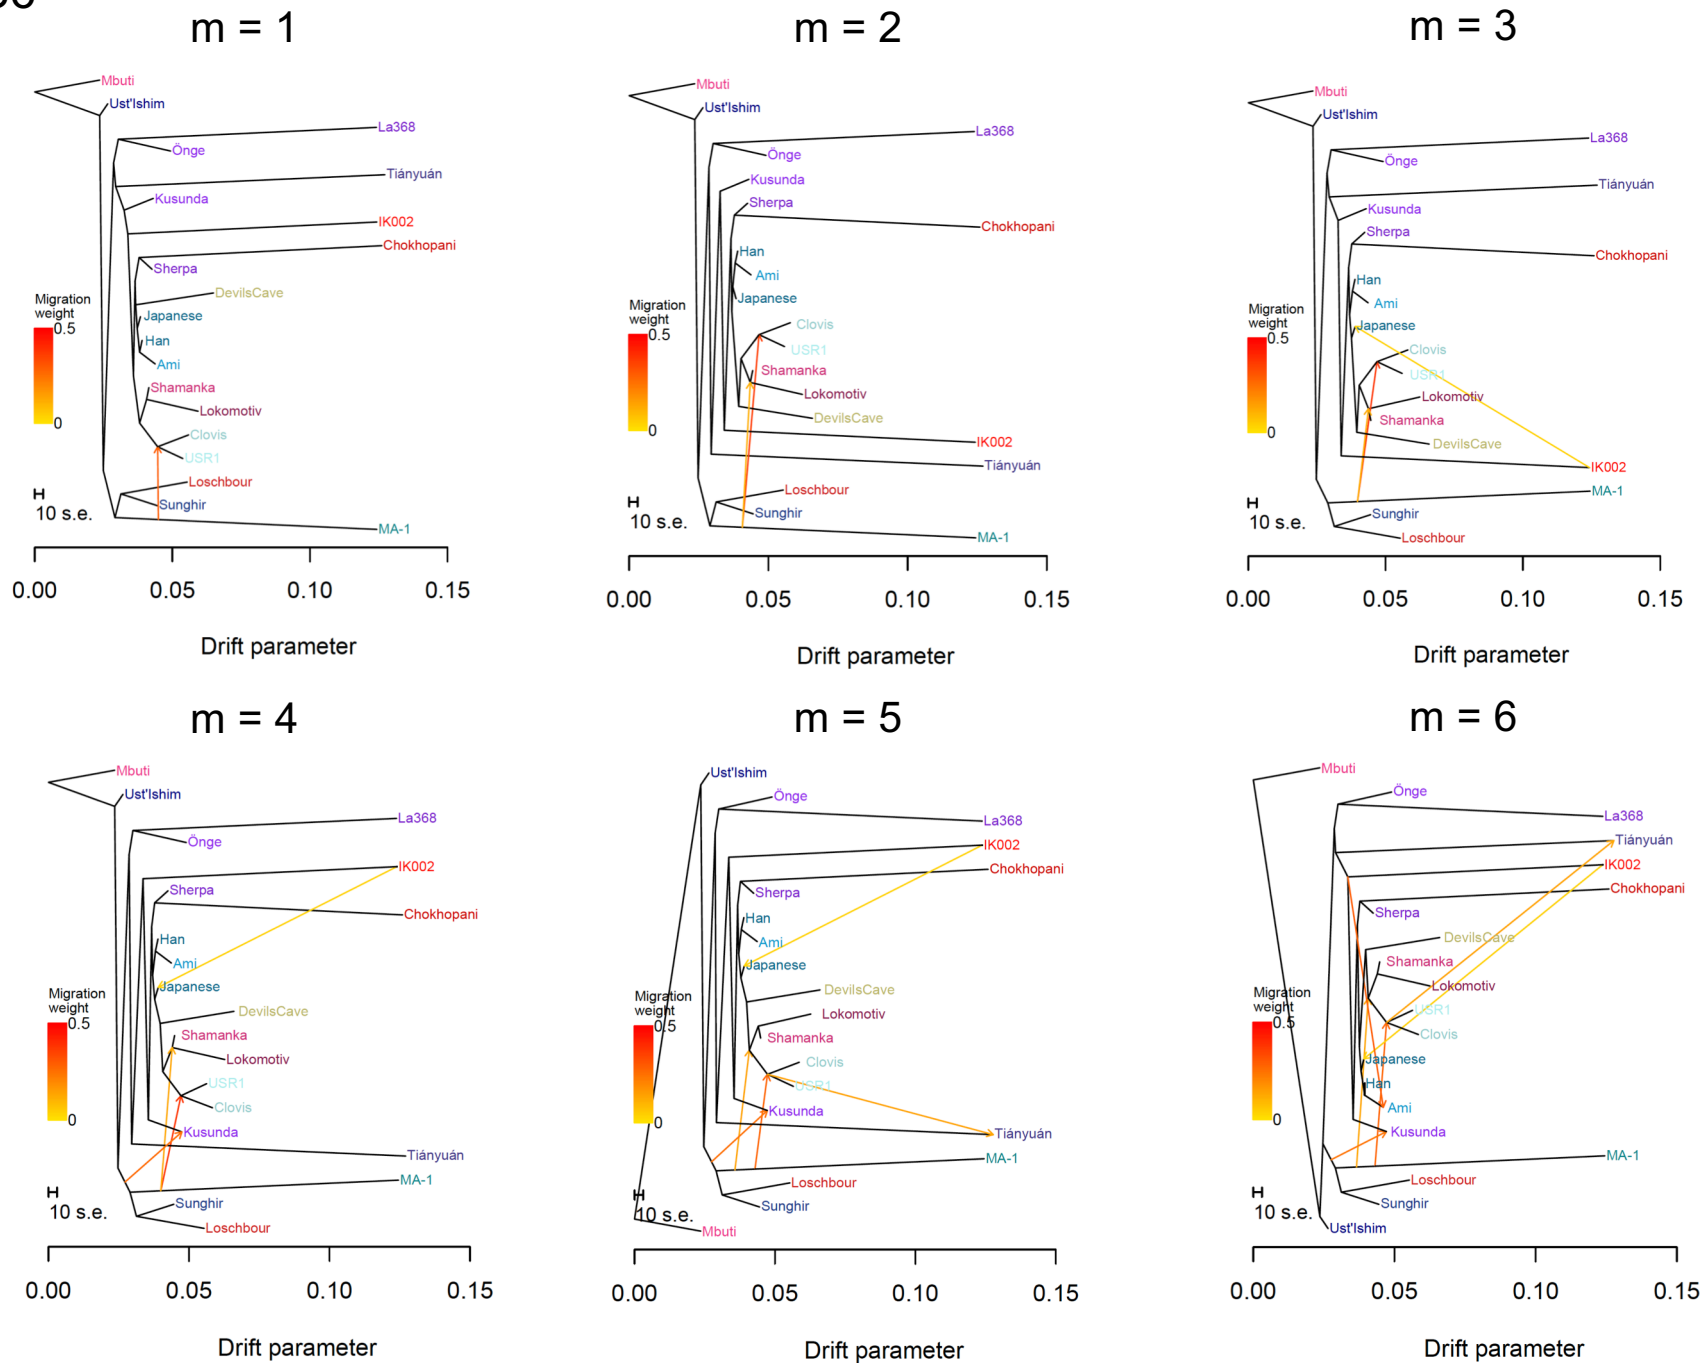



Fig. S7

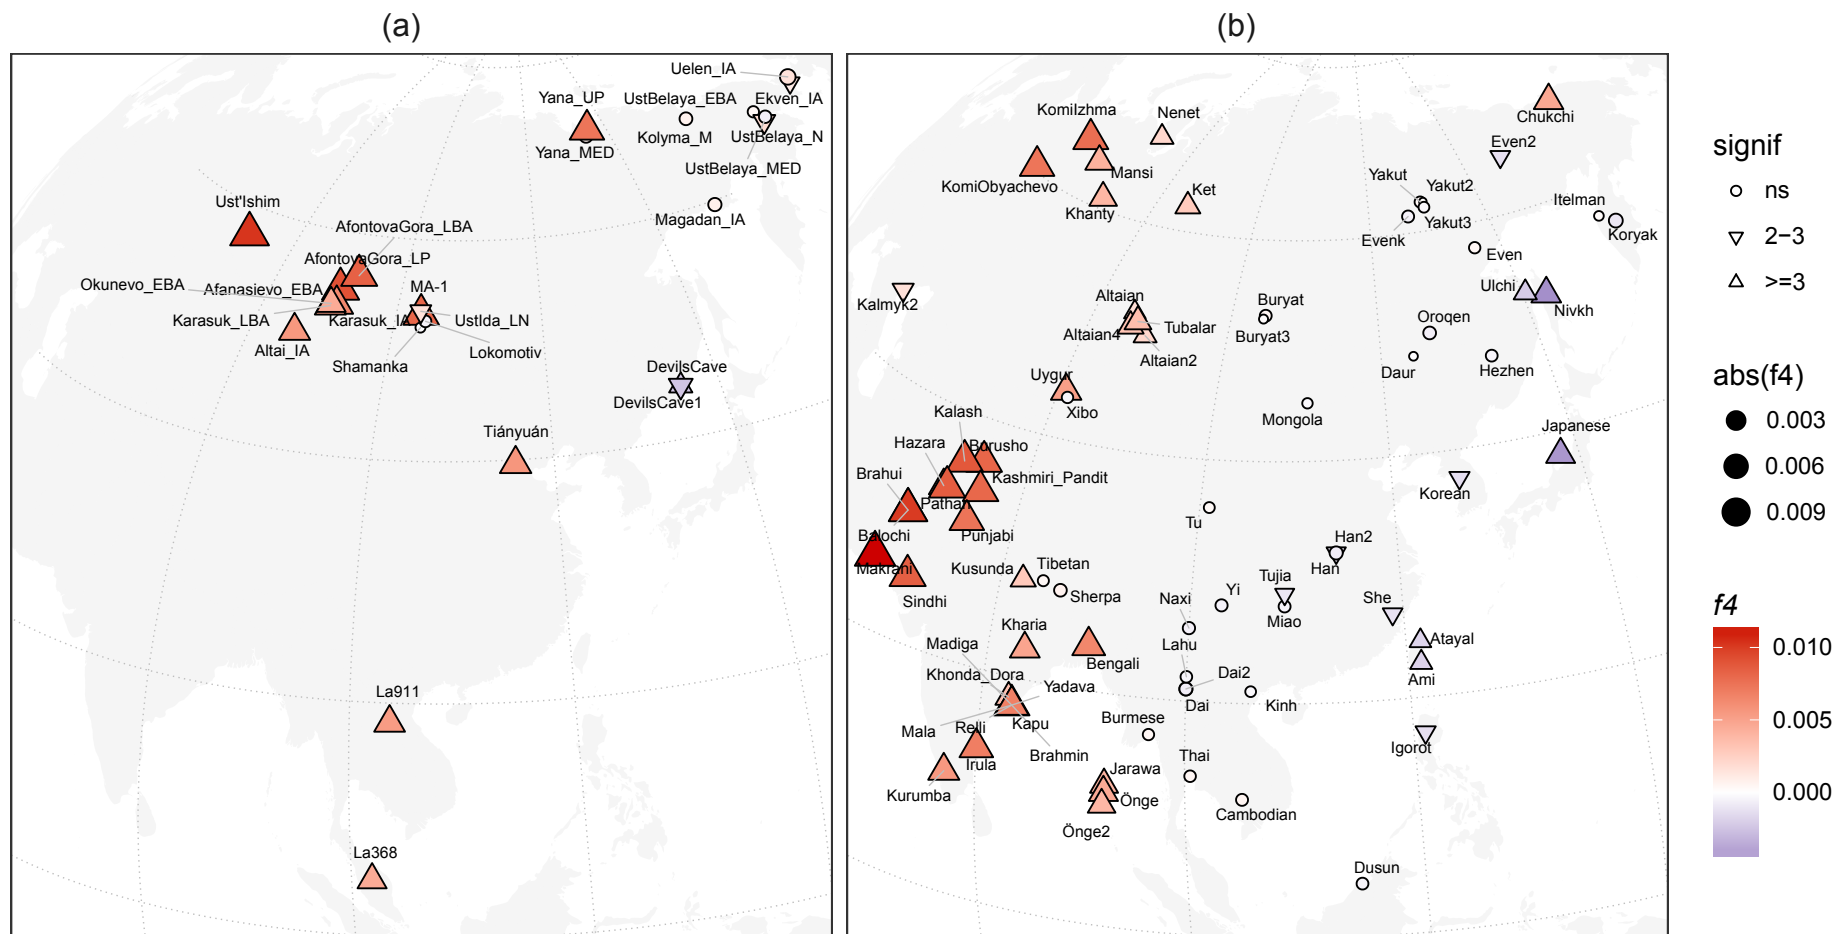

Fig. S8

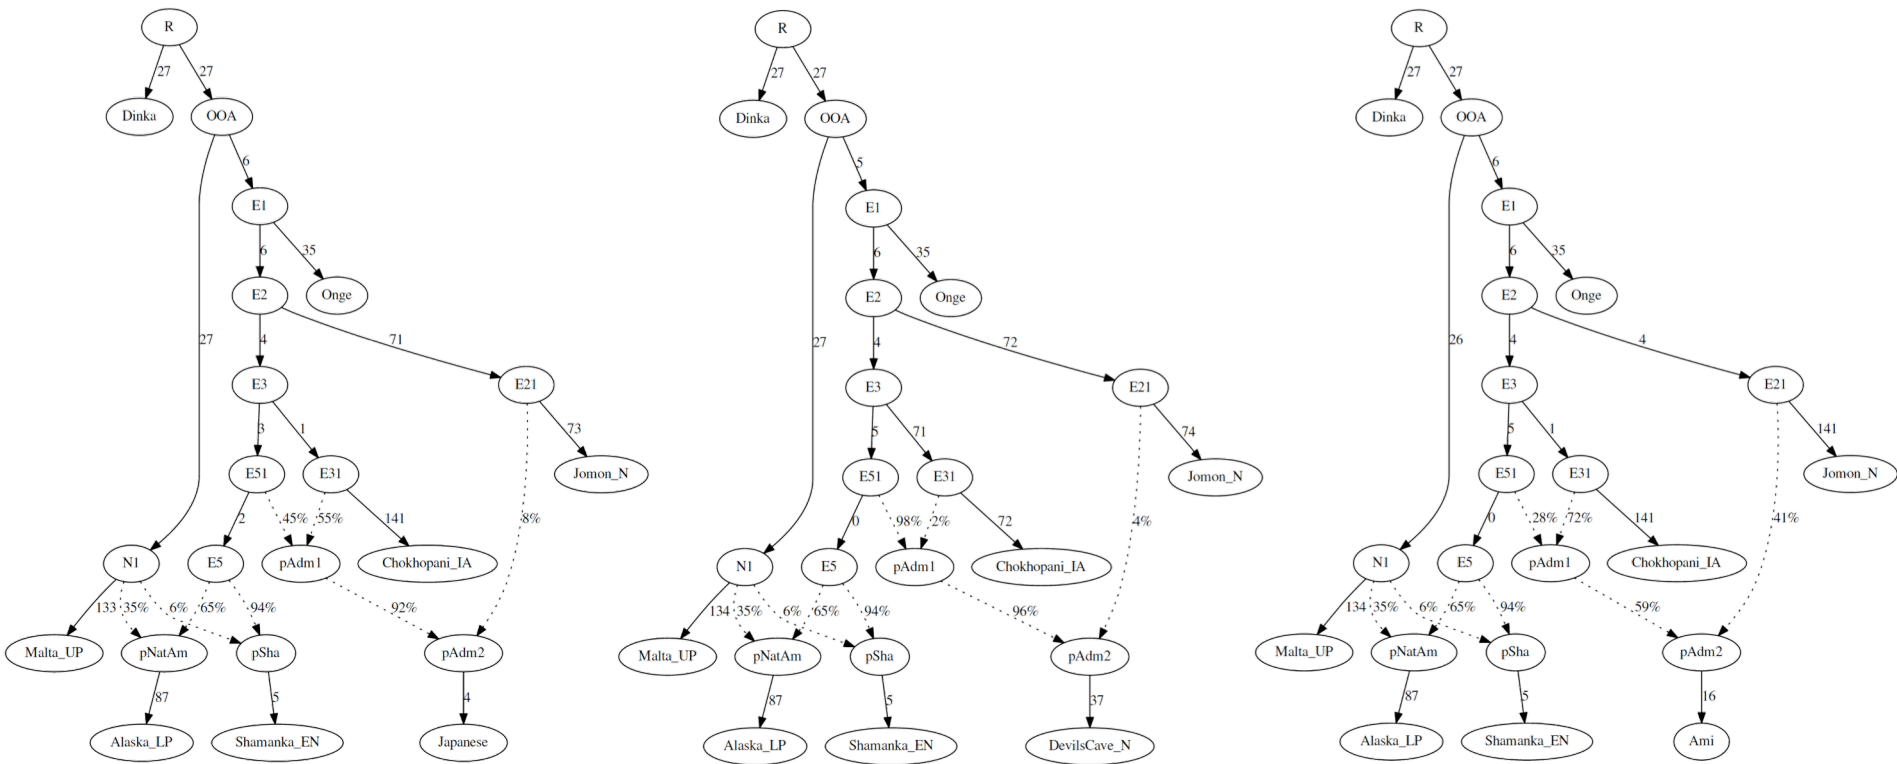

Supplement: Supplementary file [file media-2.pdf]
